# Supplementary material
Source: PubMed Central journal article supplement (PMC3057051)
Supplement: NIHMS274212-supplement-Supplementary_Data.pdf [file NIHMS274212-supplement-Supplementary_Data.pdf]

## LONG LIST OF WHI INVESTIGATORS

**Program Office:** (National Heart, Lung, and Blood Institute, Bethesda, Maryland)  
Jacques Rossouw, Shari Ludlam, Joan McGowan, Nancy Geller, Leslie Ford.

**Clinical Coordinating Center:** (Fred Hutchinson Cancer Research Center, Seattle, WA)  
Ross Prentice, Garnet Anderson, Andrea LaCroix, Ruth Patterson, Anne McTiernan, Barbara Cochrane, Julie Hunt, Lesley Tinker, Charles Kooperberg, Martin McIntosh, C. Y. Wang, Chu Chen, Deborah Bowen, Alan Kristal, Janet Stanford, Nicole Urban, Noel Weiss, Emily White; (Medical Research Laboratories, Highland Heights, KY) Evan Stein, Peter Laskarzewski; (San Francisco Coordinating Center, San Francisco, CA) Steven R. Cummings, Michael Nevitt, Lisa Palermo; (University of Minnesota, Minneapolis, MN) Lisa Harnack; (Fisher BioServices, Rockville, MD) Frank Cammarata, Steve Lindenfelser; (University of Washington, Seattle, WA) Bruce Psaty, Susan Heckbert.

**Clinical Centers:** (Albert Einstein College of Medicine, Bronx, NY) Sylvia Wassertheil-Smoller, William Frishman, Judith Wylie-Rosett, David Barad, Ruth Freeman; (Baylor College of Medicine, Houston, TX) Aleksandar Rajkovic, Jennifer Hays, Ronald Young, Haleh Sangi-Haghpeykar; (Brigham and Women's Hospital, Harvard Medical School, Boston, MA) JoAnn E. Manson, Kathryn M. Rexrode, Brian Walsh, J. Michael Gaziano, Maria Bueche; (Brown University, Providence, RI) Charles B. Eaton, Michele Cyr, Gretchen Sloane, Annlouise Assaf; (Emory University, Atlanta, GA) Lawrence S. Phillips, Vicki Butler, Vivian Porter; (Fred Hutchinson Cancer Research Center, Seattle, WA) Shirley A.A. Beresford, Vicky M. Taylor, Nancy F. Woods, Maureen Henderson, Robyn Andersen; (George Washington University, Washington, DC) Lisa Martin, Judith Hsia, Nancy Gaba, Richard Katz; (Harbor-UCLA Research and Education Institute, Torrance, CA) Rowan Chlebowski, Robert Detrano, Anita Nelson, Michele Geller; (Kaiser Permanente Center for Health Research, Portland, OR) Erin LeBlanc, Yvonne Michael, Evelyn Whitlock, Victor Stevens, Njeri Karanja; (Kaiser Permanente Division of Research, Oakland, CA) Bette Caan, Stephen Sidney, Geri Bailey Jane Hirata; (Medical College of Wisconsin, Milwaukee, WI) Jane Morley Kotchen, Vanessa Barnabei, Theodore A. Kotchen, Mary Ann C. Gilligan, Joan Neuner; (MedStar Research Institute/Howard University, Washington, DC) Barbara V. Howard, Lucile Adams-Campbell, Lawrence Lessin, Cheryl Iglesia, Linda K Mickel; (Northwestern University, Chicago/Evanston, IL) Linda Van Horn, Philip Greenland, Janardan Khandekar, Liviu Klein, Carol Rosenberg; (Rush University Medical Center, Chicago, IL) Henry Black, Lynda Powell, Ellen Mason; Martha Gulati; (Stanford Prevention Research Center, Stanford, CA) Marcia L. Stefanick, Mark A. Hlatky, Bertha Chen, Randall S. Stafford, Sally Mackey; (State University of New York at Stony Brook, Stony Brook, NY) Dorothy Lane, Iris Granek, William Lawson, Catherine Messina, Gabriel San Roman; (The Ohio State University, Columbus, OH) Rebecca Jackson, Randall Harris, Electra Paskett, W. Jerry Mysiw, Michael Blumenfeld; (University of Alabama at Birmingham, Birmingham, AL) Cora E. Lewis, Albert Oberman, James M. Shikany, Monika Safford; (University of Arizona, Tucson/Phoenix, AZ) Cynthia A. Thomson, Tamsen Bassford, Cheryl Ritenbaugh, Zhao Chen, Marcia Ko; (University at Buffalo, Buffalo, NY) Jean Wactawski-Wende, Maurizio Trevisan, Ellen Smit, Amy Millen, Michael LaMonte; (University of California at Davis, Sacramento, CA) John Robbins, S. Yasmeen, Lihong Qi; (University of California at Irvine, CA) F. Allan Hubbell, Gail Frank, Nathan Wong, Nancy Greep, Bradley Monk; (University of California at Los Angeles, Los Angeles, CA) Lauren Nathan, David Heber, Robert Elashoff, Simin Liu; (University of California at San Diego, LaJolla/Chula Vista, CA) Robert D. Langer, Michael H.

Criqui, Gregory T. Talavera, Cedric F. Garland, Matthew A. Allison; (University of Cincinnati, Cincinnati, OH) Margery Gass, Nelson Watts; (University of Florida, Gainesville/Jacksonville, FL) Marian Limacher, Michael Perri, Andrew Kaunitz, R. Stan Williams, Yvonne Brinson; (University of Hawaii, Honolulu, HI) J. David Curb, Helen Petrovitch, Beatriz Rodriguez, Kamal Masaki, Patricia Blanchette; (University of Iowa, Iowa City/Davenport, IA) Robert Wallace, James Torner, Susan Johnson, Linda Snetselaar, Jennifer Robinson; (University of Massachusetts/Fallon Clinic, Worcester, MA) Judith Ockene, Milagros Rosal, Ira Ockene, Robert Yood, Patricia Aronson; (University of Medicine and Dentistry of New Jersey, Newark, NJ) Norman Lasser, Baljinder Singh, Vera Lasser, John Kostis, Peter McGovern; (University of Miami, Miami, FL) Mary Jo O'Sullivan, Linda Parker, JoNell Potter, Diann Fernandez, Pat Caralis; (University of Minnesota, Minneapolis, MN) Karen L. Margolis, Richard H. Grimm, Mary F. Perron, Julia A. Levin; (University of Nevada, Reno, NV) Robert Brunner, William Graettinger, Vicki Oujevolk, Michael Bloch; (University of North Carolina, Chapel Hill, NC) Gerardo Heiss, Pamela Haines, David Ontjes, Carla Sueta, Ellen Wells; (University of Pittsburgh, Pittsburgh, PA) Lewis Kuller, Jane Cauley, N. Carole Milas; (University of Tennessee Health Science Center, Memphis, TN) Karen C. Johnson, Suzanne Satterfield, Rongling Li, Stephanie Connelly, Fran Tylavsky; (University of Texas Health Science Center, San Antonio, TX) Robert Brzyski, Robert Schenken, Allison Rodgers, Nicole Budrys; (University of Wisconsin, Madison, WI) Gloria E. Sarto, Douglas Laube, Patrick McBride, Julie Mares, Barbara Loevinger; (Wake Forest University School of Medicine, Winston-Salem, NC) Mara Vitolins, Greg Burke, Robin Crouse, Scott Washburn; (Wayne State University School of Medicine/Hutzel Hospital, Detroit, MI) Michael S. Simon.

**Women's Health Initiative Memory Study:** (Wake Forest University School of Medicine, Winston-Salem, NC) Sally Shumaker, Stephen Rapp, Claudine Legault, Mark Espeland, Laura Coker, Michelle Naughton.

**Former Principal Investigators and Project Officers:** (Baylor College of Medicine, Houston, TX) Aleksandar Rajkovic, Jennifer Cousins, Jennifer Hays, John Foreyt; (Brown University, Providence, RI) Annlouise R. Assaf; (Emory University, Atlanta, GA) Dallas Hall, Sally McNagny; (Fred Hutchinson Cancer Research Center, Seattle, WA) Maureen Henderson, Ruth Patterson; (George Washington University, Washington, DC) Valery Miller; (Kaiser Permanente Center for Health Research, Portland, OR) Yvonne Michael, Evelyn Whitlock, Barbara Valanis; (Kaiser Permanente Division of Research, Oakland, CA) Robert Hiatt; (National Cancer Institute, Bethesda, MD) Carolyn Clifford<sup>1</sup>; (National Heart, Lung, and Blood Institute, Bethesda, Maryland) Linda Pottern; (Northwestern University, Chicago/Evanston, IL) Philip Greenland; (Rush University Medical Center, Chicago, IL) Henry Black, William Elliott; (The Ohio State University, Columbus, OH) Electra Paskett; (University at Buffalo, Buffalo, NY) Maurizio Trevisan; (University of Alabama at Birmingham, Birmingham, AL) Albert Oberman; (University of Arizona, Tucson/Phoenix, AZ) Tamsen Bassford, Tom Moon, Cheryl Ritenbaugh; (University of California at Irvine, CA) Frank Meyskens, Jr.; (University of California at Los Angeles, CA) Howard Judd<sup>1</sup>; (University of Cincinnati, Cincinnati, OH) Margery Gass, James Liu, Nelson Watts; (University of Miami, Miami, FL) Marianna Baum, (University of Minnesota, Minneapolis, MN) Richard Grimm; (University of Nevada, Reno, NV) Sandra Daugherty<sup>1</sup>; (University of North Carolina, Chapel Hill, NC) David Sheps, Barbara Hulka; (University of Tennessee Health Science Center, Memphis, TN) William Applegate; (University

of Texas Health Science Center, San Antonio, TX) Robert Schenken; (University of Wisconsin, Madison, WI) Catherine Allen<sup>1</sup>; (Wake Forest University School of Medicine, Winston-Salem, NC) Denise Bonds, Greg Burke; (Wayne State University School of Medicine/Hutzel Hospital, Detroit, MI) Susan Hendrix.

<sup>1</sup>deceased
